# Supplementary material
Source: PubMed Central journal article supplement (PMC8404415)
Supplement: NIHMS1727455-supplement-Leonard_Supplemental_Material.pdf [file NIHMS1727455-supplement-Leonard_Supplemental_Material.pdf]

## Supporting Information

for

### Isothermal Titration Calorimetry of $\text{Be}^{2+}$ and $\text{Ca}^{2+}$ with Phosphatidylserine Models Guides All-Atom Force Field Development for Lipid-Ion Interactions

Alison N. Leonard,<sup>a,b</sup> Jeffery B. Klauda,<sup>a,c\*</sup> and Sergei Sukharev<sup>a,d\*</sup>

<sup>a</sup> Biophysics Program, University of Maryland, College Park, Maryland 20742, United States

<sup>b</sup> Laboratory of Computational Biology, National Heart, Lung, and Blood Institute, National Institutes of Health, Bethesda Maryland 20892, United States

<sup>c</sup> Department of Chemical and Biomolecular Engineering, University of Maryland, College Park, Maryland 20742, United States

<sup>d</sup> Department of Biology, University of Maryland, College Park, Maryland 20742, United States

Email address of corresponding author: [jbklauda@umd.edu](mailto:jbklauda@umd.edu), [sukharev@umd.edu](mailto:sukharev@umd.edu)

Phone number of corresponding author: 301-405-1320, 301-405-6923

### Contents

|                                                                                                            |    |
|------------------------------------------------------------------------------------------------------------|----|
| <b>Figure S1. Figure S5. <math>\text{Be}^{2+}</math> coordination by acetate, lipid FF</b> .....           | S2 |
| <b>Figure S2. <math>\text{Be}^{2+}</math> coordination by acetate, revised CGENFF</b> .....                | S2 |
| <b>Figure S3. Figure S5. <math>\text{Be}^{2+}</math> coordination by dimethyl phosphate</b> .....          | S3 |
| <b>Figure S4. ITC data for <math>\text{Be}^{2+}</math> with dimethyl phosphate (DMP)</b> .....             | S4 |
| <b>Figure S5. ITC data for <math>\text{Be}^{2+}</math> with <math>\text{Na}^{+1}</math>-acetate.</b> ..... | S4 |
| <b>Table S1. Values of <math>2r_{ij}^{\text{min}}</math> used in FEP simulations</b> .....                 | S5 |
| <b>Figure S6. <math>\text{Be}^{2+}</math> in solution with acetate</b> .....                               | S6 |
| <b>Figure S7. Equilibration of DOPS monolayer surface tension (<math>\gamma_m</math>)</b> .....            | S7 |
| <b>Figure S8. Pair correlation functions of <math>\text{K}^{+}</math> with various oxygens</b> .....       | S7 |
| <b>Figure S9. Histogram of <math>\text{Be}^{2+}</math>-phosphate association times</b> .....               | S8 |

**Appendix S1. Soluble acetate model for lipid FF.....S9**

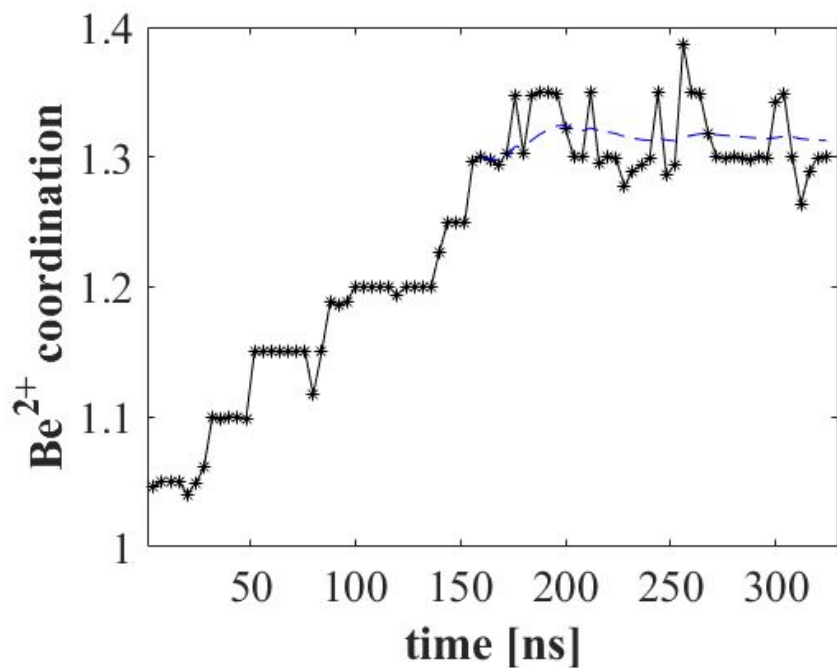

**Figure S1.  $\text{Be}^{2+}$  coordination by dimethyl phosphate.** Each point represents  $N_{\text{ion}} - O_{\text{dp}}$  averaged over 4-ns blocks. Equilibration is seen around 100 ns, and tight binding restricts fluctuations.

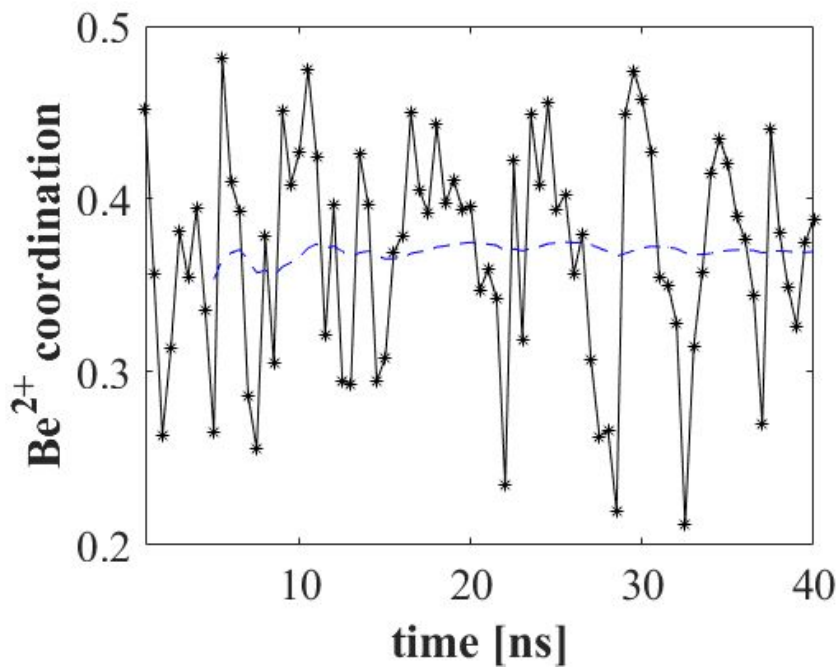

**Figure S2.  $\text{Be}^{2+}$  coordination by acetate, revised lipid FF.** Each point represents  $N_{\text{ion}} - O_{\text{dp}}$  averaged over 0.5-ns blocks. Blue dashed line is the accumulated average as a function of time from 5 ns forward.

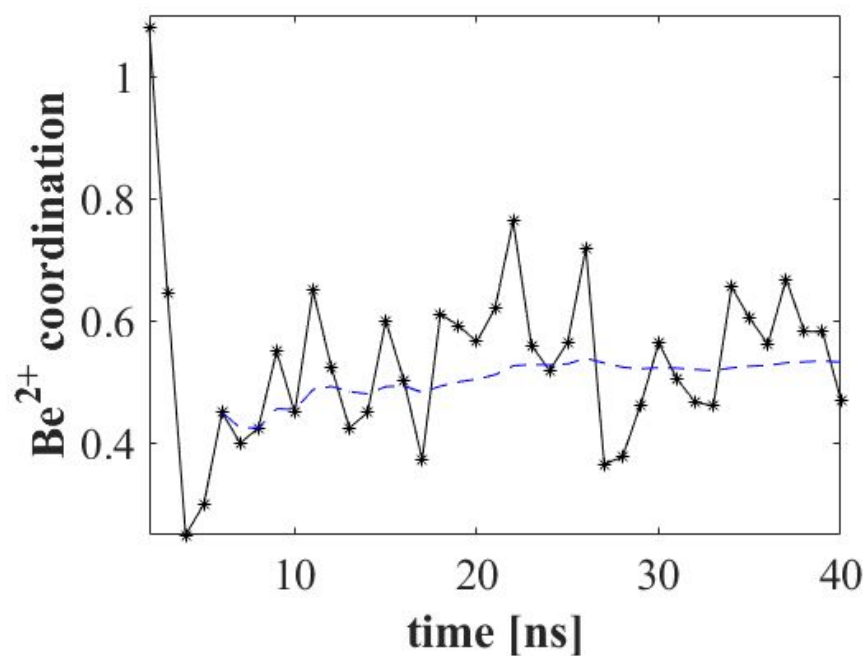

**Figure S3. Be<sup>2+</sup> coordination by acetate, revised CGENFF.** Each point represents  $N_{\text{ion} - \text{O}_{\text{dp}}}$  averaged over 2-ns blocks. Equilibration is seen around 5 ns, after which coordination fluctuates. Blue dashed line is the accumulated average as a function of time from 5 ns forward.

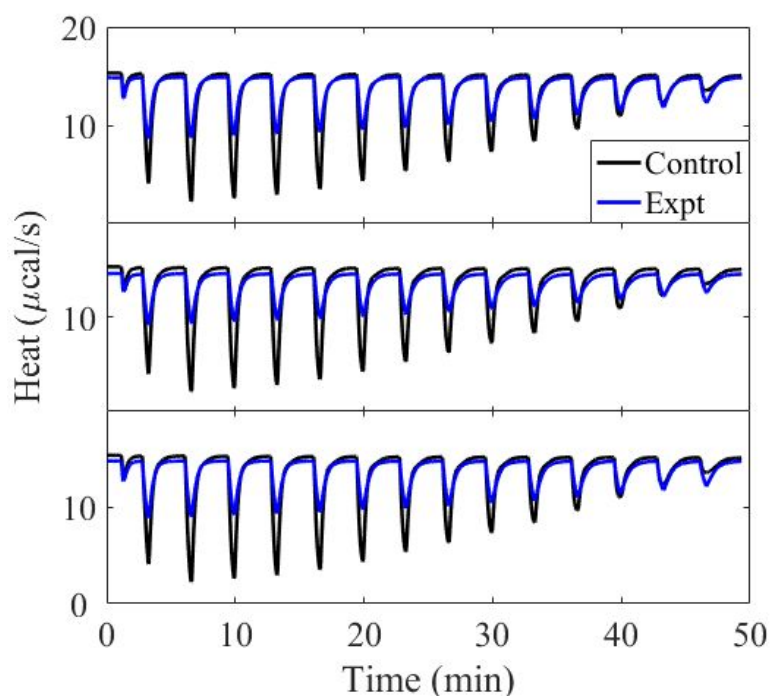

**Figure S4. ITC data for  $\text{Be}^{2+}$  with dimethyl phosphate (DMP).** Concentrations were 4 mM DMP in the syringe and 2 mM  $\text{Be}^{2+}$  in the cell.

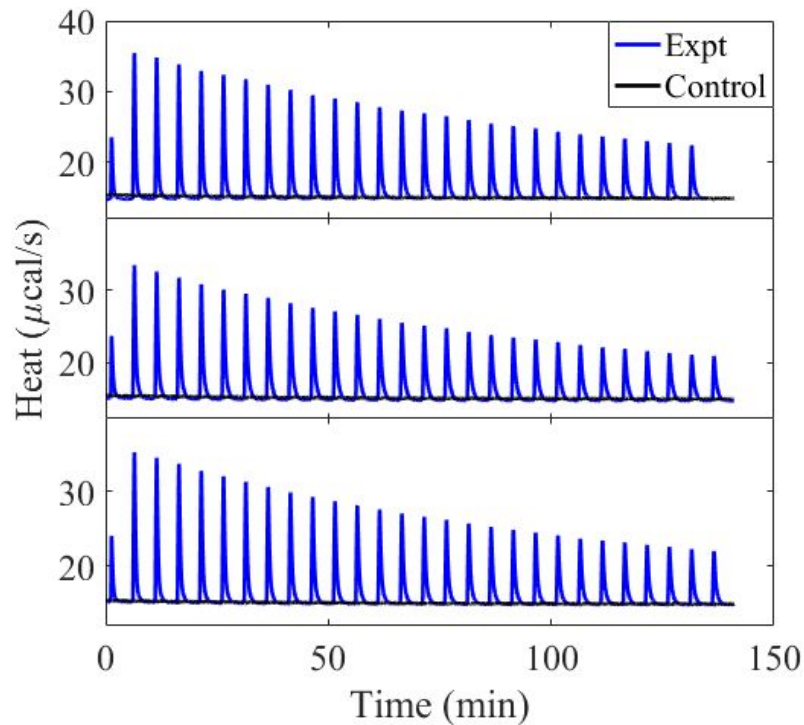

**Figure S5. ITC data for  $\text{Be}^{2+}$  with  $\text{Na}^{+1}$ -acetate.** Concentrations were 20 mM  $\text{Na}^{+1}$ -acetate in the syringe and 5 mM  $\text{Be}^{2+}$  in the cell.

**Table S1. Values of  $r_{ij}^{\min}$  [Å] used in FEP simulations to calculate free energy of association  $\Delta G_c$ .**

| <b>Small Molecule</b> | <b>CHARMM Atom Types</b> | <b><math>r_{ij}^{\min}</math> Tested/<br/># of Trials</b> |
|-----------------------|--------------------------|-----------------------------------------------------------|
| DMP<br>Lipid FF       | O2L                      | 2.51*/2                                                   |
|                       |                          | 2.8/2                                                     |
|                       |                          | 2.82/2                                                    |
|                       |                          | 2.84/4                                                    |
|                       |                          | 2.86/3                                                    |
|                       |                          | 2.88/3                                                    |
|                       |                          | 2.9/3                                                     |
|                       |                          | 2.92/3                                                    |
|                       |                          | 2.95/3                                                    |
|                       |                          | 3.0/1                                                     |
| acetate<br>CGEN FF    | OG2D2                    | 2.51*/2                                                   |
|                       |                          | 2.6/2                                                     |
|                       |                          | 2.8/2                                                     |
|                       |                          | 3.0/2                                                     |
|                       |                          | 3.20/3                                                    |
|                       |                          | 3.23/2                                                    |
|                       |                          | 3.25/2                                                    |
| acetate<br>Lipid FF** | OCL                      | 2.51*/2                                                   |
|                       |                          | 3.0/3                                                     |
|                       |                          | 3.07/3                                                    |
|                       |                          | 3.1/4                                                     |
|                       |                          | 3.2/3                                                     |

\*Default values for  $r_{ij}^{\min}$ , calculated using Eq. [6] and Be<sup>2+</sup> LJ parameters developed in this study.

\*\*New soluble acetate model for Lipid FF. See supplemental information section S2.

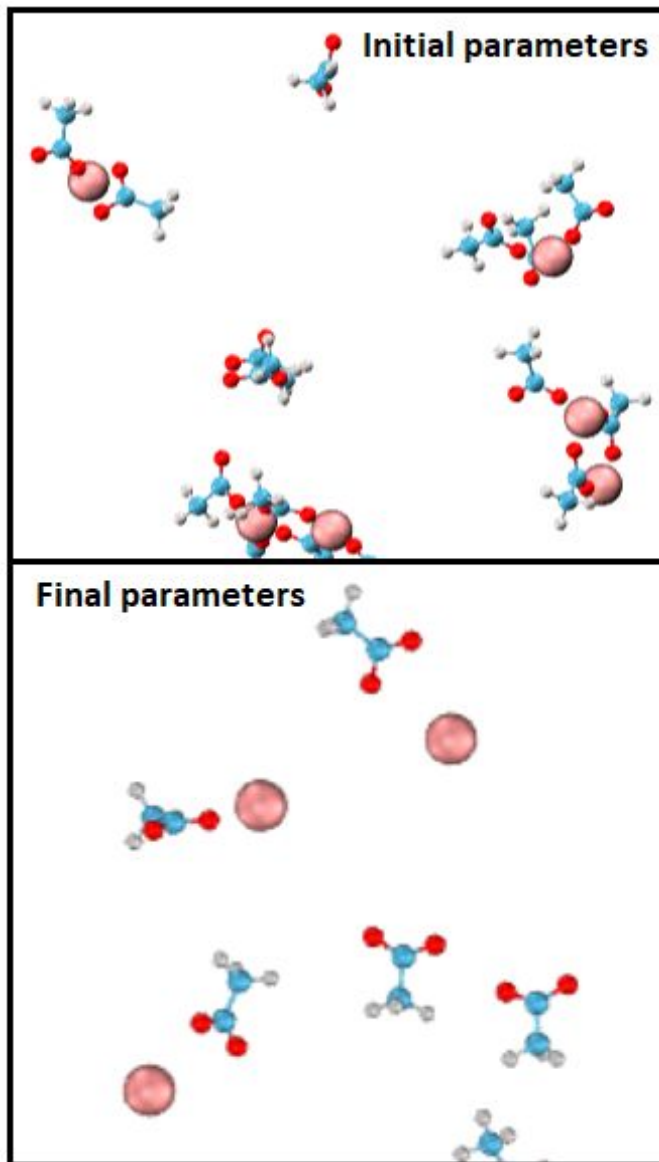

**Figure S6. Be<sup>2+</sup> in solution with acetate.** Default (top) and adjusted (bottom) LJ interaction parameters for Lipid FF. Colors: Be<sup>2+</sup>, pink; O, red; C, blue; H, gray. Water and Na<sup>+</sup> ions not shown.

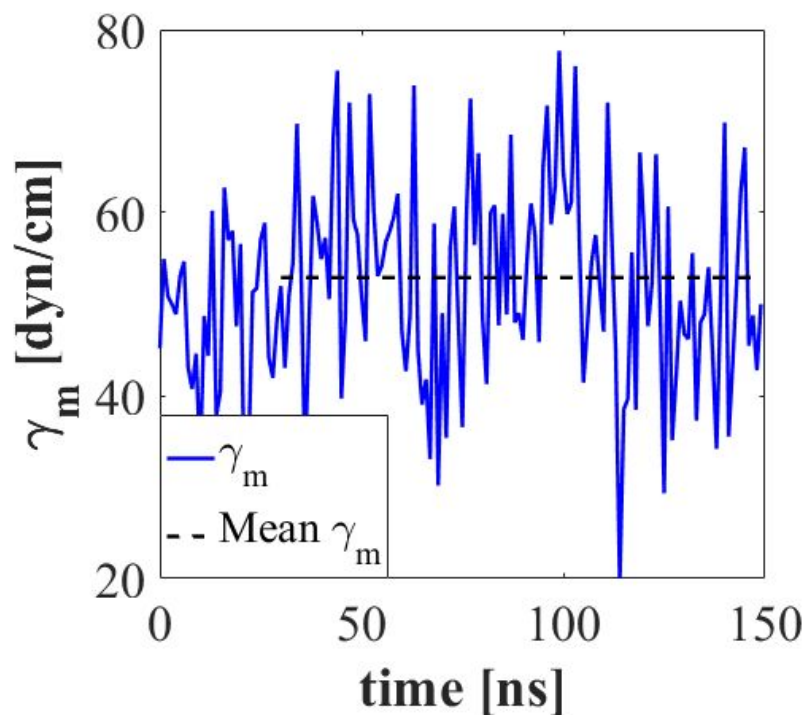

**Figure S7. Equilibration of DOPS monolayer surface tension ( $\gamma_m$ ).**  $\gamma_m$  of  $\text{Be}^{2+}$ -bound DOPS monolayer,  $A_l = 65.3 \text{ \AA}^2$ , as a function of simulation time, calculated in 1-ns blocks. Mean computed from 30 – 150 ns.

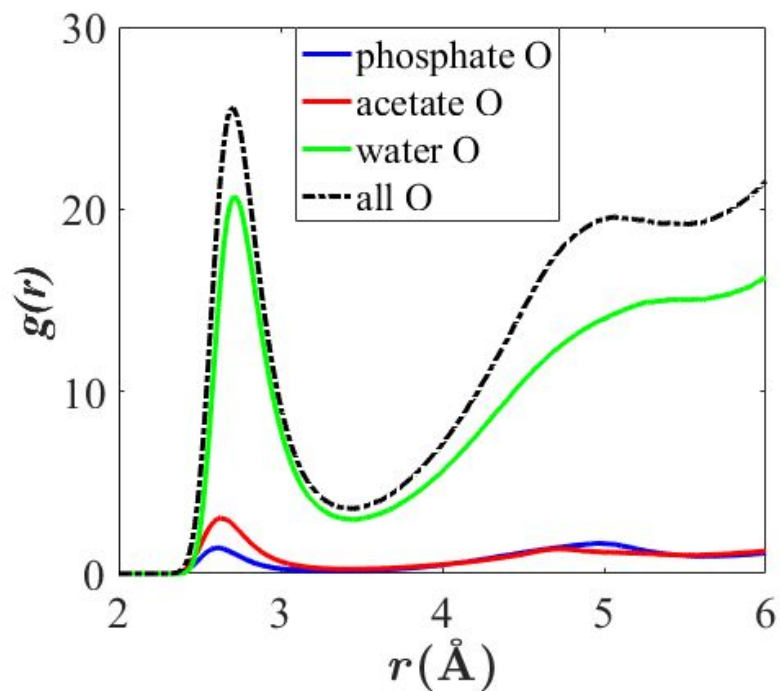

**Figure S8. Pair correlation functions of  $\text{K}^+$  with various oxygens.**  $A_l = 65.3 \text{ \AA}^2/\text{lipid}$ . For comparison,  $g(r)$  are not normalized. See Fig. 11 to compare with  $\text{Be}^{2+}$ .



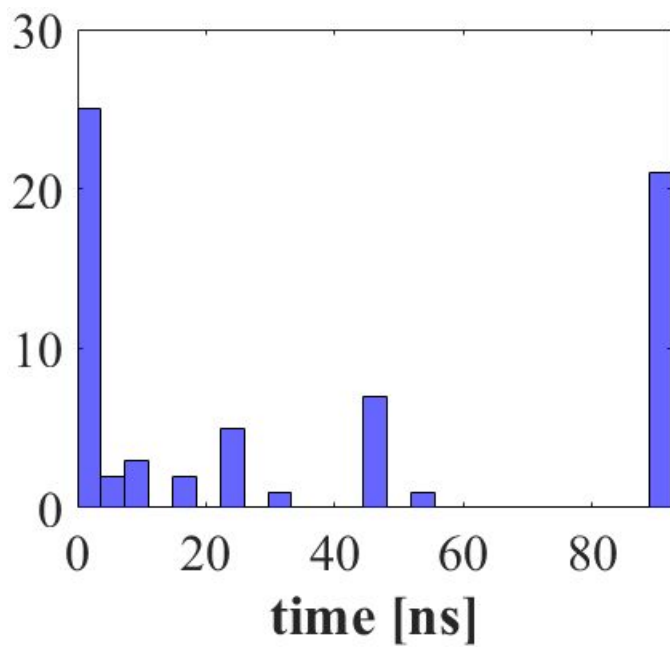

**Figure S9. Histogram of Be<sup>2+</sup>-phosphate association times.**  $A_l = 65.3 \text{ \AA}^2$ , computed from 30 – 120 ns. Associations < 20 ps not shown.

**S2. Soluble acetate models.** Residue “ACE” below is compatible with the C36 lipid FF.<sup>1</sup> Partial charges (column 4) were borrowed from residue DOPS. Atom names and types are columns 2 and 3, respectively. Where necessary, additional parameters listed were adapted from methyl acetate<sup>1</sup> and are also listed below. Parameters not listed were not changed.

Residue “ACET” is part of the CGEN FF.<sup>2</sup> Only partial charges are shown.

```
RESI ACE          -1.00 !
GROUP              !
ATOM C2  CCL      0.34 !          H1    01 (-)
ATOM O1  OCL     -0.67 !          |    /
ATOM C1  CTL3    -0.27 !        H2--C1--C2
ATOM O2  OCL     -0.67 !          |    \\
ATOM H1  HAL3     0.09 !          H3    02
ATOM H2  HAL3     0.09 !
ATOM H3  HAL3     0.09 !
BOND C1 H1  C1 H2  C1 H3
BOND C1 C2  C2 O1
DOUBLE  C2 O2
IMPR  C2 O2 O1 C1
```

Additional parameters for “ACE”:

```
BONDS
CTL3  CCL      200.0          1.522
ANGLES
OCL  CCL  CTL3      55.0      109.0      20.00      2.3260
HAL3 CTL3  CCL      33.00      109.50      30.00      2.163
DIHEDRDALS
OCL  CCL  CTL3  HAL3      0.00      6      180.0
IMPROPERS
CCL  OCL  OCL  CTL3      96.00      0      0.00
```

```
RESI ACET          -1.00 ! C2H3O2 acetate, K. Kuczera
GROUP
ATOM C1  CG331    -0.37
ATOM C2  CG203     0.62 !          H1    01 (-)
ATOM H1  HGA3     0.09 !          |    /
ATOM H2  HGA3     0.09 !        H2--C1--C2
ATOM H3  HGA3     0.09 !          |    \\
ATOM O1  OG2D2   -0.76 !          H3    02
ATOM O2  OG2D2   -0.76
BOND C1 H1  C1 H2  C1 H3
BOND C1 C2  C2 O1
DOUBLE  C2 O2
IMPR  C2 O2 O1 C1
```
